**Addendum**

## **Addendum: Laser speckle flowgraphy in juxtapapillary retinal capillary hemangioblastoma: a case report on natural course and therapeutic effect**

**Mizuho Mitamura<sup>1,2</sup>, Satoru Kase<sup>1</sup>, Kiriko Hirooka<sup>1</sup> and Susumu Ishida<sup>1</sup>**

<sup>1</sup>Department of Ophthalmology, Faculty of Medicine and Graduate School of Medicine, Hokkaido University, Sapporo, Japan

<sup>2</sup>Department of Ophthalmology, Teine Keijinkai Hospital, Sapporo, Japan

**Published:** May 26, 2023

**Copyright:** © 2023 Mitamura et al. This is an open access article distributed under the terms of the [Creative Commons Attribution License](#) (CC BY 3.0), which permits unrestricted use, distribution, and reproduction in any medium, provided the original author and source are credited.

**This article has an addendum:** Informed patient consent was obtained.

Original article: Oncotarget. 2020; 11:3800–3804. <https://doi.org/10.18632/oncotarget.27771>
